# Supplementary material for: Effect of certolizumab pegol on signs and symptoms in patients with psoriatic arthritis: 24-week results of a Phase 3 double-blind randomised placebo-controlled study (RAPID-PsA)
Source: PubMed Central journal article supplement — Ann Rheum Dis. 2013 Aug 13;73(1):48–55. doi: 10.1136/annrheumdis-2013-203696 (PMC3888622; doi:10.1136/annrheumdis-2013-203696), 2013-08-13
Supplement: annrheumdis-2013-203696-s1.pdf [file annrheumdis-2013-203696-s1.pdf]

## SUPPLEMENTARY INFORMATION

**Table S1: CASPAR criteria[1]**

|                                                                                                                                                                                                                                                                                                                                                                                                                                                                                                                                                                                                                                                                         |
|-------------------------------------------------------------------------------------------------------------------------------------------------------------------------------------------------------------------------------------------------------------------------------------------------------------------------------------------------------------------------------------------------------------------------------------------------------------------------------------------------------------------------------------------------------------------------------------------------------------------------------------------------------------------------|
| Evidence of current psoriasis, a personal history of psoriasis, or a family history of psoriasis ( <b>2 points</b> ) <ul style="list-style-type: none"> <li>• Current psoriasis is defined as psoriatic skin or scalp disease present today as judged by a rheumatologist or dermatologist.†</li> <li>• A personal history of psoriasis is defined as a history of psoriasis that may be obtained from a patient, family physician, dermatologist, rheumatologist, or other qualified health care provider.</li> <li>• A family history of psoriasis is defined as a history of psoriasis in a first- or second-degree relative according to patient report.</li> </ul> |
| Typical psoriatic nail dystrophy including onycholysis, pitting, and hyperkeratosis observed on current physical examination ( <b>1 point</b> )                                                                                                                                                                                                                                                                                                                                                                                                                                                                                                                         |
| A negative test result for the presence of rheumatoid factor by any method except latex ( <b>1 point</b> )                                                                                                                                                                                                                                                                                                                                                                                                                                                                                                                                                              |
| Either current dactylitis, defined as swelling of an entire digit, or a history of dactylitis recorded by a rheumatologist ( <b>1 point</b> )                                                                                                                                                                                                                                                                                                                                                                                                                                                                                                                           |
| Radiographic evidence of juxta-articular new bone formation appearing as ill-defined ossification near joint margins (but excluding osteophyte formation) on plain radiographs of the hand or foot ( <b>1 point</b> )                                                                                                                                                                                                                                                                                                                                                                                                                                                   |

† Current psoriasis is assigned a score of 2; all other features are assigned a score of 1.

**Table S2: Effects of certolizumab pegol treatment on ACR components at week 24**

| ACR component                                     | Mean change from baseline ± SD |                              |                              |
|---------------------------------------------------|--------------------------------|------------------------------|------------------------------|
|                                                   | Placebo<br>(n=136)             | CZP<br>200 mg Q2W<br>(n=138) | CZP<br>400 mg Q4W<br>(n=135) |
| <b>Swollen joint count</b>                        | -0.5 ± 9.2                     | -7.9 ± 8.7                   | -7.4 ± 6.5                   |
| <b>Tender joint count</b>                         | -2.9 ± 11.5                    | -13.0 ± 14.6                 | -10.2 ± 12.6                 |
| <b>Patient's assessment of pain</b>               | -11.2 ± 21.8                   | -28.6 ± 28.8                 | -28.4 ± 25.5                 |
| <b>Patient's assessment of disease activity</b>   | -8.0 ± 24.0                    | -29.2 ± 28.4                 | -27.8 ± 25.3                 |
| <b>Physician's assessment of disease activity</b> | -16.5 ± 24.6                   | -37.2 ± 21.1                 | -37.1 ± 23.7                 |
| <b>HAQ-DI</b>                                     | -0.17 ± 0.43                   | -0.52 ± 0.66                 | -0.43 ± 0.54                 |
| <b>CRP* (mg/L)</b>                                | -3.9 ± 17.4                    | -10.8 ± 27.2                 | -6.3 ± 17.2                  |

ACR: American College of Rheumatology; CRP: C-reactive protein; CZP: Certolizumab pegol; HAQ-DI: Health assessment questionnaire – disability index; Q2W: Every 2 weeks; Q4W: Every 4 weeks. p<0.001 CZP 200 mg Q2W and CZP 400 mg Q4W vs. placebo; \* Normal range of CRP < 7.9 mg/L

**Table S3: ACR20 responders at week 12 by regional subgroups**

| Region                      | Placebo<br>(n=136) | CZP 200 mg Q2W<br>(n=138) | CZP 400 mg Q4W<br>(n=135) |
|-----------------------------|--------------------|---------------------------|---------------------------|
| <b>North America, % (n)</b> | 21.9 (7/32)        | 51.6 (16/31)              | 62.9 (22/35)              |
| <b>Latin America, % (n)</b> | 63.2 (12/19)       | 85.7 (18/21)              | 65.0 (13/20)              |
| <b>West Europe, % (n)</b>   | 27.3 (6/22)        | 64.7 (11/17)              | 62.5 (10/16)              |
| <b>East Europe, % (n)</b>   | 12.7 (8/63)        | 50.7 (35/69)              | 39.1 (25/64)              |

CZP: Certolizumab pegol; Q2W: Every 2 weeks; Q4W: Every 4 weeks.

**Table S4: Effects of certolizumab pegol treatment on enthesitis and dactylitis at week 24**

| Outcome,                       | Placebo<br>(n=136) | CZP<br>200 mg Q2W<br>(n=138) | CZP<br>400 mg Q4W<br>(n=135) |
|--------------------------------|--------------------|------------------------------|------------------------------|
| Leeds Enthesitis Index, n      | 91                 | 88                           | 84                           |
| Mean change from baseline ± SD | -1.1 ± 1.8         | -2.0 ± 1.8 <sup>†</sup>      | -1.8 ± 1.9 <sup>‡</sup>      |
| Leeds Dactylitis Index, n      | 35                 | 35                           | 38                           |
| Mean change from baseline ± SD | -22.0 ± 46.9       | -40.7 ± 34.6 <sup>‡</sup>    | -53.5 ± 69.1 <sup>†</sup>    |

CZP: Certolizumab pegol; Q2W: Every 2 weeks; Q4W: Every 4 weeks; SD: standard deviation. <sup>†</sup>p<0.001; <sup>‡</sup>p≤0.003.

**Table S5: Baseline demographics and disease severity characteristics, by prior TNF inhibitor use\***

|                                                              | No prior TNF<br>exposure<br>(n=329) | Prior TNF<br>exposure<br>(n=80) |
|--------------------------------------------------------------|-------------------------------------|---------------------------------|
| <b>Demographic characteristics</b>                           |                                     |                                 |
| Age, years                                                   | 47.3 ± 11.3                         | 48.7 +/- 11.7                   |
| Sex, % female                                                | 55.6                                | 53.8                            |
| Weight, kg                                                   | 83.7 ± 18.4                         | 87.5 ± 20.1                     |
| BMI, kg/m <sup>2</sup>                                       | 29.5 ± 6.5                          | 31.0 ± 6.4                      |
| <b>Arthritis characteristics</b>                             |                                     |                                 |
| Time from psoriatic arthritis diagnosis <sup>∞</sup> , years | 8.2 ± 8.4                           | 10.1 ± 7.2                      |
| CRP** (mg/L), median (min-max)                               | 8.0 (0.1-140.6)                     | 10.3 (0.1-238.0)                |
| ESR (mm/h), median (min-max)                                 | 33.0 (4 -120)                       | 38.0 (5 -125)                   |
| Tender joint count (0-68 joints), mean                       | 19.8                                | 22.4                            |
| Swollen joint count (0-66 joints), mean                      | 10.2                                | 12.6                            |
| HAQ-DI (range 0-3)                                           | 1.3 ± 0.7                           | 1.4 ± 0.7                       |
| Enthesitis, % <sup>†</sup>                                   | 62.3                                | 72.5                            |
| Dactylitis, % <sup>‡</sup>                                   | 26.4                                | 26.3                            |
| <b>Psoriasis characteristics</b>                             |                                     |                                 |
| Psoriasis BSA ≥3%, %                                         | 59.6                                | 70.0                            |
| PASI, mean <sup>#</sup>                                      | 11.6                                | 12.0                            |
| Nail involvement, %                                          | 72.6                                | 76.3                            |
| mNAPSI, mean                                                 | 3.3                                 | 3.2                             |
| Concomitant MTX at baseline, %                               | 65.0                                | 55.0                            |
| No concomitant DMARDs at baseline, %                         | 32.2                                | 42.5                            |
| Prior use of DMARDs, %                                       |                                     |                                 |
| 1                                                            | 50.8                                | 50.0                            |
| ≥ 2                                                          | 48.9                                | 40.1                            |
| Prior use of NSAIDs, %                                       | 86.9                                | 80.0                            |

\* Except where indicated otherwise, values are the mean ± SD. There were no significant differences between treatment groups at baseline. BMI: Body mass index; BSA: Body surface area; CRP: C-reactive protein; CZP: Certolizumab pegol; DI: Disability index; DMARDs: Disease modifying antirheumatic drugs; ESR: Erythrocyte sedimentation rate; HAQ: Health Assessment Questionnaire; NSAIDs: Nonsteroidal anti-inflammatory drugs; mNAPSI: modified nail psoriasis severity index; MTX: Methotrexate; PASI: Psoriasis area and severity index; Q2W: Every 2 weeks; Q4W: Every 4 weeks; TNF: Tumor necrosis factor; VAS: Visual analogue scale

<sup>∞</sup>From the start date of the primary disease

<sup>†</sup> Presence of enthesitis at baseline defined as a Baseline Leeds Enthesitis Index score > 0

<sup>‡</sup> Presence of dactylitis at baseline assessed using Leeds Dactylitis Index

<sup>#</sup> PASI – scores for those patients with psoriasis body surface area ≥ 3% at baseline

\*\* Normal range of CRP < 7.9 mg/L

<sup>††</sup> n=135

**Table S6: Baseline demographics and disease severity characteristics, by concomitant DMARD use at baseline\***

|                                                              | No concomitant DMARD use (n=122) | Concomitant DMARD use (n=287) |
|--------------------------------------------------------------|----------------------------------|-------------------------------|
| <b>Demographic characteristics</b>                           |                                  |                               |
| Age, years                                                   | 46.1 ± 11.8                      | 48.2 ± 11.2                   |
| Sex, % female                                                | 56.6                             | 54.7                          |
| Weight, kg                                                   | 84.5 ± 20.9                      | 84.4 ± 17.8                   |
| BMI, kg/m <sup>2</sup>                                       | 29.7 ± 7.2                       | 29.8 ± 6.2                    |
| <b>Arthritis characteristics</b>                             |                                  |                               |
| Time from psoriatic arthritis diagnosis <sup>∞</sup> , years | 9.0 ± 8.2                        | 8.4 ± 8.2                     |
| CRP** (mg/L), median (min-max)                               | 7.0 (0.2-238.0)                  | 8.0 (0.1-143.0)               |
| ESR (mm/h), median (min-max)                                 | 34.0 (4-125)                     | 33.5 (5-125)                  |
| Tender joint count (0-68 joints), mean                       | 21.7                             | 19.7                          |
| Swollen joint count (0-66 joints), mean                      | 11.2                             | 10.4                          |
| HAQ-DI (range 0-3)                                           | 1.34                             | 1.29                          |
| Enthesitis, % <sup>†</sup>                                   | 65.6                             | 63.8                          |
| Dactylitis, % <sup>‡</sup>                                   | 26.2                             | 26.5                          |
| <b>Psoriasis characteristics</b>                             |                                  |                               |
| Psoriasis BSA ≥3%, %                                         | 66.4                             | 59.6                          |
| PASI, mean <sup>#</sup>                                      | 13.0                             | 11.1                          |
| Nail involvement, %                                          | 69.7                             | 74.9                          |
| mNAPSI, mean                                                 | 3.6                              | 3.2                           |
| <b>Prior use of DMARDs, %</b>                                |                                  |                               |
| 1                                                            | 56.6                             | 48.1                          |
| ≥ 2                                                          | 36.8                             | 51.5                          |
| <b>Prior TNF inhibitor exposure, %</b>                       |                                  |                               |
|                                                              | 26.2                             | 16.7                          |

\* Except where indicated otherwise, values are the mean ± SD. There were no significant differences between treatment groups at baseline. BMI: Body mass index; BSA: Body surface area; CRP: C-reactive protein; CZP: Certolizumab pegol; DI: Disability index; DMARDs: Disease modifying antirheumatic drugs; ESR: Erythrocyte sedimentation rate; HAQ: Health Assessment Questionnaire; NSAIDs: Nonsteroidal anti-inflammatory drugs; mNAPSI: modified nail psoriasis severity index; MTX: Methotrexate; PASI: Psoriasis area and severity index; Q2W: Every 2 weeks; Q4W: Every 4 weeks; TNF: Tumor necrosis factor; VAS: Visual analogue scale

† Presence of enthesitis at baseline defined as a Baseline Leeds Enthesitis Index score > 0

‡ Presence of dactylitis at baseline assessed using Leeds Dactylitis Index

# PASI – scores for those patients with psoriasis body surface area ≥ 3% at baseline

\*\* Normal range of CRP < 7.9 mg/L

†† n=135

**Table S7: ACR20 week 12 responder rate by prior use of DMARDs subgroup**

|                             | Placebo<br>n=136<br>%<br>(n) | CZP 200 mg Q2W<br>n=138<br>%<br>(n) | CZP 400 mg Q4W<br>n=135<br>%<br>(n) |
|-----------------------------|------------------------------|-------------------------------------|-------------------------------------|
| <b>Subgroup</b>             |                              |                                     |                                     |
| <b>Prior use of sDMARDs</b> |                              |                                     |                                     |
| 1                           | 29.7<br>(22/74)              | 68.9<br>(42/61)                     | 58.3<br>(42/72)                     |
| ≥2                          | 18.3<br>(11/60)              | 52.1<br>(38/73)                     | 46.7<br>(28/60)                     |

CZP: Certolizumab pegol; DMARDs: Disease modifying antirheumatic drugs; Q2W: Every 2 weeks; Q4W: Every 4 weeks

**Table S8: TEAEs with an incidence of >3% in either CZP group during the 24-week double-blind period**

| System Organ Class<br>Preferred Term                        | Placebo*<br>(n=136)<br>n(%)** | CZP 200 mg Q2W<br>(n=138)<br>n(%)** | CZP 400 mg Q4W<br>(n=135)<br>n(%)** |
|-------------------------------------------------------------|-------------------------------|-------------------------------------|-------------------------------------|
| <b>Gastrointestinal disorders</b>                           | 19 (14.0)                     | 26 (18.8)                           | 18 (13.3)                           |
| Diarrhea                                                    | 4 (2.9)                       | 7 (5.1)                             | 5 (3.7)                             |
| Abdominal pain upper                                        | 2 (1.5)                       | 5 (3.6)                             | 3 (2.2)                             |
| <b>General disorders and administration site conditions</b> | 11 (8.1)                      | 13 (9.4)                            | 26 (19.3)                           |
| Fatigue                                                     | 2 (1.5)                       | 4 (2.9)                             | 4 (3.0)                             |
| <b>Infections and infestations</b>                          | 52 (38.2)                     | 60 (43.5)                           | 54 (40.0)                           |
| Oral herpes                                                 | 3 (2.2)                       | 2 (1.4)                             | 4 (3.0)                             |
| Bronchitis                                                  | 6 (4.4)                       | 4 (2.9)                             | 4 (3.0)                             |
| Nasopharyngitis                                             | 10 (7.4)                      | 18 (13.0)                           | 9 (6.7)                             |
| Upper respiratory tract infection                           | 7 (5.1)                       | 12 (8.7)                            | 13 (9.6)                            |
| Pharyngitis                                                 | 3 (2.2)                       | 6 (4.3)                             | 4 (3.0)                             |
| Sinusitis                                                   | 1 (0.7)                       | 3 (2.2)                             | 6 (4.4)                             |
| Urinary tract infection                                     | 9 (6.6)                       | 3 (2.2)                             | 4 (3.0)                             |
| <b>Investigations</b>                                       | 14 (10.3)                     | 20 (14.5)                           | 24 (17.8)                           |
| Alanine aminotransferase increased                          | 2 (1.5)                       | 4 (2.9)                             | 7 (5.2)                             |
| Aspartate aminotransferase increased                        | 1 (0.7)                       | 4 (2.9)                             | 6 (4.4)                             |
| Hepatic enzyme increased                                    | 2 (1.5)                       | 5 (3.6)                             | 4 (3.0)                             |
| Blood CPK increased                                         | 4 (2.9)                       | 5 (3.6)                             | 6 (4.4)                             |
| <b>Nervous system disorders</b>                             | 10 (7.4)                      | 10 (7.2)                            | 12 (8.9)                            |
| Headache                                                    | 2 (1.5)                       | 6 (4.3)                             | 5 (3.7)                             |

\*placebo escape at week 16; \*\*Not adjusted for exposure; CZP: Certolizumab pegol; Q2W: Every 2 weeks; Q4W: Every 4 weeks; CPK: creatine phosphokinase.

**Figure S1: ACR20 response rates over time**

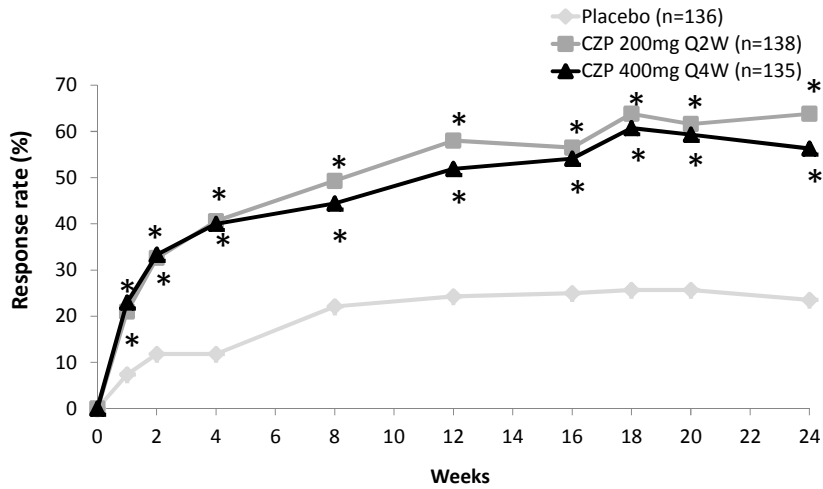

\*Nominal p value  $\leq 0.001$  versus placebo. Q2W: Every 2 weeks, Q4W: Every 4 weeks.

**Figure S2: Patients achieving MDA response over time**

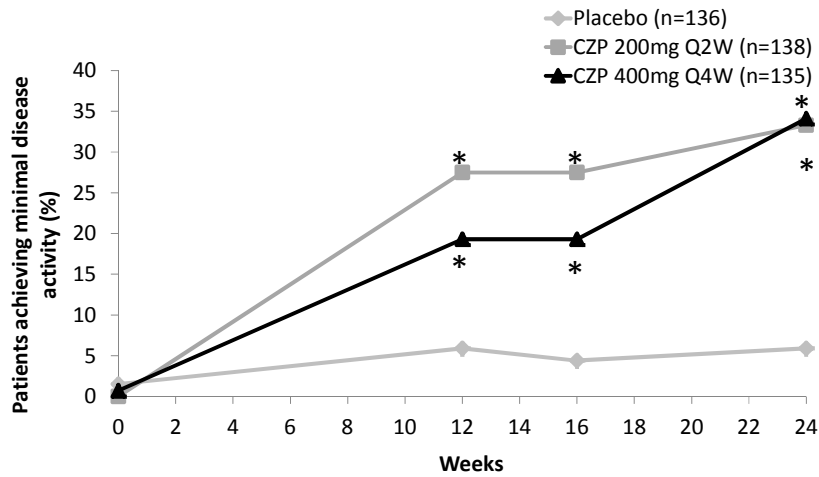

\*Nominal p value  $< 0.001$  versus placebo. Q2W: Every 2 weeks, Q4W: Every 4 weeks.

## REFERENCES

1. Taylor W, Gladman D, Helliwell P, Marchesoni A, Mease P, Mielants H. Classification criteria for psoriatic arthritis: development of new criteria from a large international study. *Arthritis and rheumatism* 2006;**54**(8):2665-73 doi: 10.1002/art.21972 [published Online First: 28 July 2006].
